# Supplementary material for: Vertical distribution of sub-micron aerosol chemical composition from North-Western Europe and the North-East Atlantic
Source: Copernicus journal article supplement (doi:10.5194/acp-9-5389-2009), 2009-08-03
Supplement: Supplementary file [file acp-9-5389-2009-supplement.pdf]

# Vertical distribution of sub-micron aerosol chemical composition from North-Western Europe and the North-East Atlantic

W.T. Morgan<sup>1</sup>, J.D. Allan<sup>1,2</sup>, K.N. Bower<sup>1</sup>, G. Capes<sup>1</sup>, J. Crosier<sup>1,2</sup>,  
P.I. Williams<sup>1,2</sup> and H. Coe<sup>1</sup>

1. Centre for Atmospheric Science, University of Manchester, Manchester, UK

2. National Centre for Atmospheric Science, University of Manchester, UK

Correspondance to: W. T. Morgan (william.morgan@postgrad.manchester.ac.uk)

**Supplementary material for the maunscript published in ACP.**

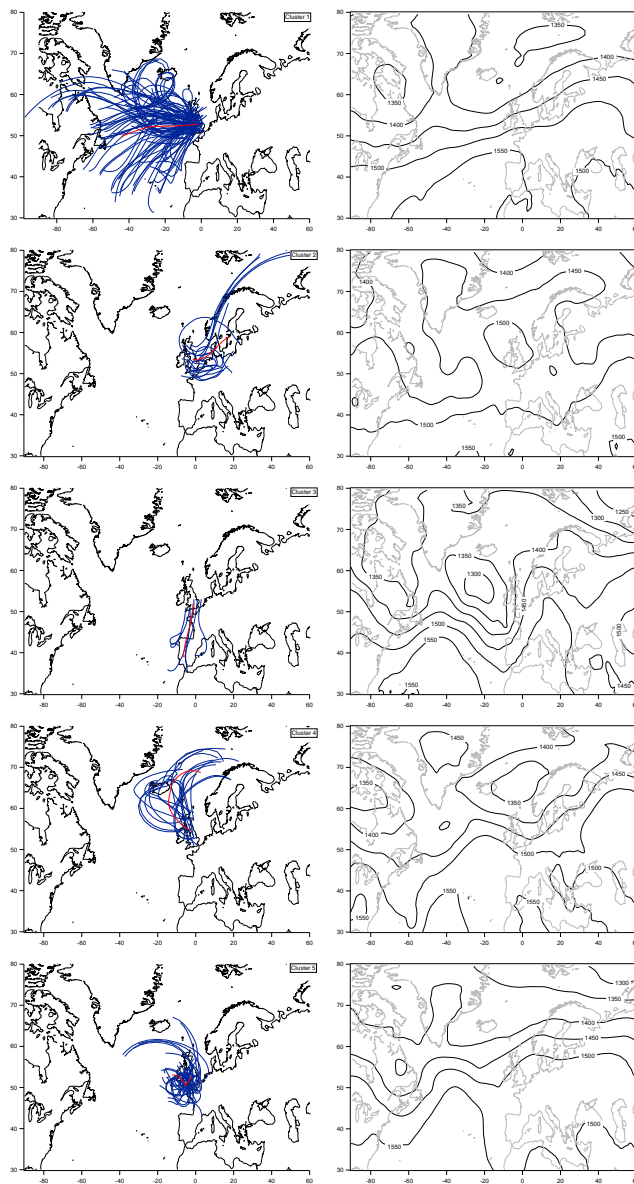

Figure S1: Maps of all back trajectories for each cluster along with the mean trajectory (red line). Also shown are average ECMWF\* 850hPa geopotential height fields based on a 2.5 by 2.5 horizontal grid. \*European Centre for Medium-Range Weather Forecasts. ECMWF Operational Analysis data, [Internet]. BADC, .2006-2008.

Available from <http://badc.nerc.ac.uk/data/ecmwf-op/>

| Species  | Statistic                   | Altitude (km) |         |         |         |         |         |         |         |         |         |         |  |
|----------|-----------------------------|---------------|---------|---------|---------|---------|---------|---------|---------|---------|---------|---------|--|
|          |                             | 0.0-0.5       | 0.5-1.0 | 1.0-1.5 | 1.5-2.0 | 2.0-2.5 | 2.5-3.0 | 3.0-3.5 | 3.5-4.0 | 4.0-4.5 | 4.5-5.0 | 5.0-5.5 |  |
| Organics | 25 <sup>th</sup> percentile | 0.066         | -0.121  | -0.201  | -0.280  | -0.218  | -0.348  | -0.378  | -0.609  | -1.067  | -0.846  | -1.420  |  |
|          | 50 <sup>th</sup> percentile | 0.768         | 0.558   | 0.535   | 0.415   | 0.441   | 0.333   | 0.228   | 0.033   | -0.013  | -0.070  | -0.309  |  |
|          | 75 <sup>th</sup> percentile | 1.632         | 1.470   | 1.445   | 1.323   | 1.383   | 0.904   | 1.081   | 1.037   | 1.048   | 1.075   | 0.731   |  |
| Sulphate | Mean                        | 1.052         | 0.801   | 0.799   | 0.716   | 0.610   | 0.446   | 0.382   | 0.264   | 0.206   | 0.199   | -0.188  |  |
|          | $MAE/\sqrt{n}$              | 0.049         | 0.047   | 0.054   | 0.060   | 0.083   | 0.084   | 0.067   | 0.146   | 0.175   | 0.191   | 0.208   |  |
|          | 25 <sup>th</sup> percentile | 0.302         | 0.200   | 0.203   | 0.142   | 0.107   | 0.075   | 0.053   | 0.030   | -0.042  | -0.030  | -0.041  |  |
| Nitrate  | 50 <sup>th</sup> percentile | 0.800         | 0.678   | 0.663   | 0.482   | 0.450   | 0.254   | 0.311   | 0.189   | 0.117   | 0.185   | 0.148   |  |
|          | 75 <sup>th</sup> percentile | 1.504         | 1.365   | 1.358   | 1.103   | 0.925   | 0.687   | 0.532   | 0.512   | 0.412   | 0.374   | 0.524   |  |
|          | Mean                        | 1.093         | 1.029   | 0.964   | 0.782   | 0.642   | 0.409   | 0.341   | 0.330   | 0.176   | 0.182   | 0.254   |  |
| Ammonium | $MAE/\sqrt{n}$              | 0.032         | 0.031   | 0.032   | 0.028   | 0.035   | 0.030   | 0.026   | 0.049   | 0.035   | 0.049   | 0.047   |  |
|          | 25 <sup>th</sup> percentile | 0.027         | 0.014   | 0.017   | -0.004  | -0.009  | -0.015  | -0.017  | -0.030  | -0.032  | -0.082  | -0.030  |  |
|          | 50 <sup>th</sup> percentile | 0.140         | 0.099   | 0.079   | 0.045   | 0.049   | 0.027   | 0.033   | 0.017   | 0.020   | 0.005   | 0.028   |  |
| Ammonium | 75 <sup>th</sup> percentile | 0.619         | 0.516   | 0.623   | 0.170   | 0.178   | 0.119   | 0.090   | 0.076   | 0.136   | 0.115   | 0.151   |  |
|          | Mean                        | 0.911         | 0.696   | 0.657   | 0.328   | 0.310   | 0.099   | 0.052   | 0.022   | 0.038   | 0.017   | 0.052   |  |
|          | $MAE/\sqrt{n}$              | 0.033         | 0.025   | 0.026   | 0.015   | 0.019   | 0.012   | 0.007   | 0.012   | 0.016   | 0.019   | 0.019   |  |
| Ammonium | 25 <sup>th</sup> percentile | -0.028        | -0.072  | -0.110  | -0.176  | -0.220  | -0.186  | -0.348  | -0.470  | -0.464  | -0.402  | -0.418  |  |
|          | 50 <sup>th</sup> percentile | 0.375         | 0.306   | 0.352   | 0.274   | 0.262   | 0.157   | 0.045   | 0.106   | 0.092   | 0.197   | 0.180   |  |
|          | 75 <sup>th</sup> percentile | 0.910         | 0.879   | 0.935   | 0.782   | 0.729   | 0.593   | 0.564   | 0.548   | 0.725   | 0.596   | 0.640   |  |
| Ammonium | Mean                        | 0.646         | 0.550   | 0.514   | 0.384   | 0.303   | 0.234   | 0.062   | 0.001   | 0.100   | 0.137   | 0.156   |  |
|          | $MAE/\sqrt{n}$              | 0.030         | 0.028   | 0.033   | 0.034   | 0.051   | 0.046   | 0.043   | 0.115   | 0.101   | 0.127   | 0.119   |  |

Table S1a: Profile statistics summary for the full dataset from 0.0-5.5km. MAE refers to the Mean Absolute Error and  $n$  refers to the number of points.

| Species  | Statistic                   | Altitude (km) |         |         |         |         |         |         |         |          |           |           |
|----------|-----------------------------|---------------|---------|---------|---------|---------|---------|---------|---------|----------|-----------|-----------|
|          |                             | 5.5-6.0       | 6.0-6.5 | 6.5-7.0 | 7.0-7.5 | 7.5-8.0 | 8.0-8.5 | 8.5-9.0 | 9.0-9.5 | 9.5-10.0 | 10.0-10.5 | 10.5-11.0 |
| Organics | 25 <sup>th</sup> percentile | -1.400        | -1.392  | -1.118  | -0.931  | -1.629  | -1.262  | -1.568  | -1.322  | -2.032   | -2.160    | -1.857    |
|          | 50 <sup>th</sup> percentile | 0.275         | 0.139   | 0.535   | 0.661   | -0.031  | 0.563   | -0.109  | 0.958   | 0.026    | -0.351    | 0.079     |
|          | 75 <sup>th</sup> percentile | 1.514         | 1.130   | 1.878   | 2.059   | 1.542   | 2.307   | 2.532   | 3.458   | 2.246    | 2.349     | 2.012     |
| Sulphate | Mean                        | 0.227         | -0.039  | 0.566   | 0.812   | 0.181   | 0.762   | 0.666   | 1.687   | 0.062    | -0.301    | 0.498     |
|          | $MAE/\sqrt{n}$              | 0.327         | 0.301   | 0.342   | 0.261   | 0.320   | 0.338   | 0.301   | 0.381   | 0.514    | 0.458     | 0.561     |
|          | 25 <sup>th</sup> percentile | -0.063        | -0.130  | -0.168  | -0.081  | -0.212  | -0.175  | -0.060  | -0.106  | -0.424   | -0.057    | 0.184     |
| Nitrate  | 50 <sup>th</sup> percentile | 0.222         | 0.177   | 0.242   | 0.228   | 0.206   | 0.227   | 0.263   | 0.348   | 0.460    | 0.271     | 0.715     |
|          | 75 <sup>th</sup> percentile | 0.542         | 0.552   | 0.523   | 0.665   | 0.659   | 0.850   | 0.693   | 0.834   | 0.891    | 0.778     | 1.023     |
|          | Mean                        | 0.2123        | 0.162   | 0.188   | 0.264   | 0.216   | 0.321   | 0.315   | 0.301   | 0.409    | 0.423     | 0.603     |
| Nitrate  | $MAE/\sqrt{n}$              | 0.0589        | 0.075   | 0.083   | 0.063   | 0.080   | 0.100   | 0.072   | 0.090   | 0.165    | 0.089     | 0.146     |
|          | 25 <sup>th</sup> percentile | -0.096        | -0.112  | -0.169  | -0.063  | -0.124  | -0.067  | -0.093  | -0.195  | -0.186   | -0.252    | -0.198    |
|          | 50 <sup>th</sup> percentile | 0.003         | 0.007   | 0.024   | 0.033   | 0.011   | 0.014   | 0.023   | -0.007  | 0.100    | 0.048     | 0.031     |
| Ammonium | 75 <sup>th</sup> percentile | 0.173         | 0.099   | 0.121   | 0.217   | 0.160   | 0.168   | 0.192   | 0.130   | 0.324    | 0.229     | 0.281     |
|          | Mean                        | 0.031         | -0.020  | -0.0312 | 0.042   | 0.024   | 0.012   | 0.020   | -0.035  | 0.094    | 0.048     | 0.101     |
|          | $MAE/\sqrt{n}$              | 0.026         | 0.048   | 0.080   | 0.031   | 0.030   | 0.034   | 0.036   | 0.046   | 0.070    | 0.060     | 0.056     |
| Ammonium | 25 <sup>th</sup> percentile | -0.595        | -0.499  | -0.612  | -0.832  | -0.726  | -0.724  | -1.023  | -1.338  | -1.294   | -0.706    | -0.860    |
|          | 50 <sup>th</sup> percentile | 0.146         | 0.176   | 0.148   | 0.204   | 0.364   | 0.008   | 0.253   | 0.016   | 0.334    | 0.159     | -0.042    |
|          | 75 <sup>th</sup> percentile | 0.902         | 1.012   | 0.832   | 0.883   | 0.972   | 0.947   | 1.247   | 1.334   | 1.384    | 1.288     | 0.735     |
| Ammonium | Mean                        | 0.093         | 0.185   | 0.090   | 0.011   | 0.332   | 0.135   | 0.068   | -0.083  | -0.050   | 0.194     | 0.056     |
|          | $MAE/\sqrt{n}$              | 0.145         | 0.150   | 0.179   | 0.187   | 0.166   | 0.161   | 0.225   | 0.217   | 0.403    | 0.206     | 0.269     |

Table S1b: Profile statistics summary for the full dataset from 5.5-11.0km.

| Species  | Statistic                   | Altitude (km) |         |         |         |         |         |         |         |         |         |         |  |
|----------|-----------------------------|---------------|---------|---------|---------|---------|---------|---------|---------|---------|---------|---------|--|
|          |                             | 0.0-0.5       | 0.5-1.0 | 1.0-1.5 | 1.5-2.0 | 2.0-2.5 | 2.5-3.0 | 3.0-3.5 | 3.5-4.0 | 4.0-4.5 | 4.5-5.0 | 5.0-5.5 |  |
| Organics | 25 <sup>th</sup> percentile | -0.009        | -0.150  | -0.239  | -0.379  | -0.433  | -0.360  | -0.429  | -0.257  | -0.660  | -1.063  | -0.852  |  |
|          | 50 <sup>th</sup> percentile | 0.624         | 0.442   | 0.243   | 0.210   | 0.233   | 0.258   | 0.107   | 0.909   | 0.420   | 0.116   | 0.007   |  |
|          | 75 <sup>th</sup> percentile | 1.264         | 1.145   | 0.934   | 0.861   | 0.837   | 0.730   | 0.832   | 1.862   | 2.018   | 1.777   | 1.905   |  |
|          | Mean                        | 0.673         | 0.479   | 0.336   | 0.287   | 0.281   | 0.3067  | 0.314   | 0.830   | 0.963   | 0.748   | 0.633   |  |
| Sulphate | $MAE/\sqrt{n}$              | 0.058         | 0.054   | 0.053   | 0.072   | 0.108   | 0.119   | 0.088   | 0.381   | 0.371   | 0.323   | 0.313   |  |
|          | 25 <sup>th</sup> percentile | 0.299         | 0.243   | 0.193   | 0.189   | 0.105   | 0.087   | 0.095   | -0.088  | -0.117  | -0.173  | -0.011  |  |
|          | 50 <sup>th</sup> percentile | 0.764         | 0.583   | 0.485   | 0.434   | 0.3547  | 0.241   | 0.366   | 0.184   | 0.107   | 0.266   | 0.120   |  |
|          | 75 <sup>th</sup> percentile | 1.282         | 1.112   | 1.164   | 0.864   | 0.731   | 0.617   | 0.583   | 0.772   | 0.329   | 0.471   | 0.499   |  |
| Nitrate  | Mean                        | 0.933         | 0.782   | 0.775   | 0.642   | 0.527   | 0.338   | 0.385   | 0.384   | 0.119   | 0.189   | 0.276   |  |
|          | $MAE/\sqrt{n}$              | 0.035         | 0.031   | 0.035   | 0.033   | 0.043   | 0.034   | 0.042   | 0.118   | 0.060   | 0.112   | 0.067   |  |
|          | 25 <sup>th</sup> percentile | 0.030         | 0.013   | 0.016   | -0.002  | -0.005  | -0.021  | -0.010  | -0.032  | -0.071  | -0.059  | -0.170  |  |
|          | 50 <sup>th</sup> percentile | 0.150         | 0.089   | 0.060   | 0.036   | 0.025   | 0.0054  | 0.032   | 0.022   | 0.035   | 0.098   | 0.017   |  |
| Ammonium | 75 <sup>th</sup> percentile | 0.495         | 0.392   | 0.329   | 0.091   | 0.086   | 0.043   | 0.090   | 0.079   | 0.167   | 0.196   | 0.161   |  |
|          | Mean                        | 0.489         | 0.375   | 0.278   | 0.127   | 0.142   | -0.014  | 0.055   | 0.018   | 0.030   | 0.043   | 0.010   |  |
|          | $MAE/\sqrt{n}$              | 0.024         | 0.019   | 0.016   | 0.009   | 0.014   | 0.038   | 0.010   | 0.022   | 0.035   | 0.071   | 0.052   |  |
|          | 25 <sup>th</sup> percentile | 0.012         | -0.118  | -0.186  | -0.119  | -0.301  | -0.336  | -0.346  | -0.733  | -0.521  | -0.920  | -0.408  |  |
| Ammonium | 50 <sup>th</sup> percentile | 0.379         | 0.282   | 0.296   | 0.239   | 0.202   | 0.086   | 0.082   | 0.122   | 0.021   | -0.003  | 0.062   |  |
|          | 75 <sup>th</sup> percentile | 0.802         | 0.696   | 0.743   | 0.686   | 0.651   | 0.449   | 0.564   | 0.449   | 0.305   | 0.410   | 0.389   |  |
|          | Mean                        | 0.452         | 0.344   | 0.347   | 0.333   | 0.199   | 0.112   | 0.066   | -0.098  | -0.052  | -0.209  | 0.095   |  |
|          | $MAE/\sqrt{n}$              | 0.034         | 0.033   | 0.043   | 0.041   | 0.079   | 0.068   | 0.070   | 0.192   | 0.167   | 0.327   | 0.109   |  |

Table S2a: Profile statistics summary for the Atlantic cluster from 0.0-5.5km.

| Species  | Statistic                   | Altitude (km) |         |         |         |         |         |         |         |          |           |           |
|----------|-----------------------------|---------------|---------|---------|---------|---------|---------|---------|---------|----------|-----------|-----------|
|          |                             | 5.5-6.0       | 6.0-6.5 | 6.5-7.0 | 7.0-7.5 | 7.5-8.0 | 8.0-8.5 | 8.5-9.0 | 9.0-9.5 | 9.5-10.0 | 10.0-10.5 | 10.5-11.0 |
| Organics | 25 <sup>th</sup> percentile | -1.218        | -1.056  | -1.439  | -0.876  | -1.813  | -1.197  | -0.909  | 0.006   | -1.249   | -1.880    | -1.754    |
|          | 50 <sup>th</sup> percentile | 0.055         | 0.519   | 0.299   | 0.725   | -0.116  | 0.538   | 0.630   | 1.654   | 0.026    | -0.293    | 0.206     |
|          | 75 <sup>th</sup> percentile | 1.335         | 1.430   | 1.778   | 1.964   | 1.376   | 1.818   | 3.711   | 4.336   | 2.062    | 2.349     | 2.207     |
|          | Mean                        | 0.115         | 0.243   | 0.344   | 1.086   | -0.010  | 0.837   | 1.621   | 2.229   | 0.478    | -0.118    | 0.856     |
| Sulphate | $MAE/\sqrt{n}$              | 0.316         | 0.419   | 0.381   | 0.292   | 0.377   | 0.364   | 0.430   | 0.408   | 0.5118   | 0.441     | 0.915     |
|          | 25 <sup>th</sup> percentile | -0.129        | -0.147  | -0.038  | 0.069   | -0.260  | -0.346  | -0.191  | -0.143  | -0.433   | -0.158    | -0.065    |
|          | 50 <sup>th</sup> percentile | 0.129         | 0.111   | 0.279   | 0.293   | 0.251   | 0.184   | 0.217   | 0.235   | 0.505    | 0.2267    | 0.587     |
|          | 75 <sup>th</sup> percentile | 0.368         | 0.461   | 0.526   | 0.683   | 0.659   | 0.794   | 0.636   | 0.6591  | 1.095    | 0.750     | 0.887     |
| Nitrate  | Mean                        | 0.115         | 0.093   | 0.240   | 0.338   | 0.166   | 0.308   | 0.253   | 0.270   | 0.492    | 0.394     | 0.3989    |
|          | $MAE/\sqrt{n}$              | 0.075         | 0.093   | 0.096   | 0.078   | 0.120   | 0.145   | 0.090   | 0.108   | 0.235    | 0.097     | 0.213     |
|          | 25 <sup>th</sup> percentile | -0.091        | -0.074  | -0.020  | -0.040  | -0.057  | -0.047  | -0.059  | -0.080  | -0.207   | -0.102    | -0.211    |
|          | 50 <sup>th</sup> percentile | -0.015        | 0.021   | 0.066   | 0.027   | 0.003   | 0.014   | 0.021   | 0.014   | 0.077    | 0.071     | 0.002     |
| Ammonium | 75 <sup>th</sup> percentile | 0.154         | 0.107   | 0.189   | 0.121   | 0.101   | 0.117   | 0.123   | 0.114   | 0.240    | 0.222     | 0.101     |
|          | Mean                        | 0.011         | -0.005  | 0.060   | 0.048   | 0.035   | 0.036   | 0.037   | 0.023   | 0.037    | 0.106     | 0.029     |
|          | $MAE/\sqrt{n}$              | 0.033         | 0.060   | 0.038   | 0.029   | 0.027   | 0.019   | 0.024   | 0.031   | 0.084    | 0.040     | 0.050     |
|          | 25 <sup>th</sup> percentile | -0.706        | -0.572  | -0.623  | -0.911  | -0.418  | -0.717  | -1.027  | -1.021  | -1.267   | -0.7056   | -1.172    |
| Ammonium | 50 <sup>th</sup> percentile | 0.0923        | 0.176   | -0.099  | 0.204   | 0.384   | -0.001  | 0.0256  | -0.043  | 0.177    | 0.159     | -0.091    |
|          | 75 <sup>th</sup> percentile | 0.672         | 0.928   | 0.812   | 0.883   | 0.981   | 0.7489  | 0.739   | 1.260   | 1.748    | 1.288     | 0.626     |
|          | Mean                        | -0.018        | 0.075   | -0.032  | -0.025  | 0.439   | 0.082   | -0.177  | -0.055  | 0.231    | 0.165     | -0.101    |
|          | $MAE/\sqrt{n}$              | 0.198         | 0.269   | 0.179   | 0.249   | 0.204   | 0.194   | 0.235   | 0.240   | 0.393    | 0.239     | 0.438     |

Table S2b: Profile statistics summary for the Atlantic cluster from 5.5-11.0km.

| Species  | Statistic                   | Altitude (km) |         |         |         |         |         |         |         |         |         |         |  |
|----------|-----------------------------|---------------|---------|---------|---------|---------|---------|---------|---------|---------|---------|---------|--|
|          |                             | 0.0-0.5       | 0.5-1.0 | 1.0-1.5 | 1.5-2.0 | 2.0-2.5 | 2.5-3.0 | 3.0-3.5 | 3.5-4.0 | 4.0-4.5 | 4.5-5.0 | 5.0-5.5 |  |
| Organics | 25 <sup>th</sup> percentile | 0.632         | 0.275   | 0.593   | 0.029   | 0.538   | -0.033  | -0.036  | -2.268  | -0.617  | -1.000  | -3.025  |  |
|          | 50 <sup>th</sup> percentile | 1.171         | 1.135   | 1.591   | 0.796   | 1.358   | 0.843   | 0.296   | -1.125  | 0.404   | -0.437  | -1.464  |  |
|          | 75 <sup>th</sup> percentile | 2.228         | 2.497   | 2.793   | 2.038   | 1.994   | 1.612   | 1.206   | -0.152  | 0.589   | 1.771   | 0.341   |  |
|          | Mean                        | 1.481         | 1.480   | 1.758   | 1.068   | 1.399   | 0.933   | 0.473   | -1.245  | 0.061   | 0.067   | -1.481  |  |
| Sulphate | $MAE/\sqrt{n}$              | 0.112         | 0.121   | 0.153   | 0.121   | 0.171   | 0.194   | 0.180   | 0.690   | 0.654   | 0.461   | 0.853   |  |
|          | 25 <sup>th</sup> percentile | 0.570         | 0.179   | 0.588   | 0.331   | 0.619   | 0.294   | 0.157   | 0.314   | 0.243   | -0.347  | -0.354  |  |
|          | 50 <sup>th</sup> percentile | 1.037         | 0.985   | 1.074   | 0.801   | 1.030   | 0.713   | 0.319   | 0.417   | 0.743   | -0.035  | 0.272   |  |
|          | 75 <sup>th</sup> percentile | 1.724         | 2.297   | 1.783   | 1.299   | 1.509   | 1.277   | 0.752   | 0.781   | 1.001   | 0.154   | 0.492   |  |
| Nitrate  | Mean                        | 1.308         | 1.429   | 1.315   | 0.975   | 1.100   | 0.960   | 0.485   | 0.663   | 0.656   | -0.081  | 0.139   |  |
|          | $MAE/\sqrt{n}$              | 0.077         | 0.108   | 0.068   | 0.072   | 0.099   | 0.124   | 0.073   | 0.139   | 0.180   | 0.118   | 0.355   |  |
|          | 25 <sup>th</sup> percentile | 0.079         | 0.029   | 0.077   | 0.0467  | 0.091   | 0.064   | 0.033   | -0.027  | -0.007  | -0.072  | 0.002   |  |
|          | 50 <sup>th</sup> percentile | 0.440         | 0.354   | 0.737   | 0.125   | 0.256   | 0.261   | 0.061   | 0.017   | 0.010   | -0.045  | 0.026   |  |
| Ammonium | 75 <sup>th</sup> percentile | 1.255         | 2.323   | 2.708   | 0.815   | 1.194   | 0.560   | 0.141   | 0.038   | 0.027   | -0.005  | 0.096   |  |
|          | Mean                        | 1.898         | 1.588   | 1.827   | 0.753   | 1.006   | 0.508   | 0.105   | 0.004   | 0.013   | -0.044  | 0.042   |  |
|          | $MAE/\sqrt{n}$              | 0.166         | 0.137   | 0.143   | 0.072   | 0.135   | 0.066   | 0.014   | 0.021   | 0.010   | 0.019   | 0.014   |  |
|          | 25 <sup>th</sup> percentile | 0.096         | 0.052   | 0.213   | -0.030  | 0.090   | -0.006  | -0.479  | -0.198  | -0.789  | -0.847  | -0.949  |  |
| Ammonium | 50 <sup>th</sup> percentile | 0.677         | 0.482   | 0.891   | 0.378   | 0.669   | 0.248   | -0.007  | 0.266   | 1.245   | 0.093   | 0.277   |  |
|          | 75 <sup>th</sup> percentile | 1.713         | 1.611   | 1.328   | 1.239   | 1.444   | 0.992   | 0.760   | 0.923   | 1.917   | 1.106   | 1.386   |  |
|          | Mean                        | 1.294         | 1.044   | 1.034   | 0.633   | 0.896   | 0.436   | -0.013  | 0.233   | 0.761   | 0.156   | 0.226   |  |
|          | $MAE/\sqrt{n}$              | 0.112         | 0.090   | 0.094   | 0.082   | 0.152   | 0.143   | 0.160   | 0.495   | 1.202   | 0.622   | 0.476   |  |

Table S3a: Profile statistics summary for the easterly cluster from 0.0-5.5km.

| Species  | Statistic                       | Altitude (km) |         |         |         |         |         |         |         |          |           |           |     |     |     |
|----------|---------------------------------|---------------|---------|---------|---------|---------|---------|---------|---------|----------|-----------|-----------|-----|-----|-----|
|          |                                 | 5.5-6.0       | 6.0-6.5 | 6.5-7.0 | 7.0-7.5 | 7.5-8.0 | 8.0-8.5 | 8.5-9.0 | 9.0-9.5 | 9.5-10.0 | 10.0-10.5 | 10.5-11.0 |     |     |     |
| Organics | 25 <sup>th</sup> percentile     | -3.329        | -1.816  | N/A     | N/A     | N/A     | N/A     | N/A     | N/A     | N/A      | N/A       | N/A       | N/A | N/A | N/A |
|          | 50 <sup>th</sup> percentile     | 0.100         | -0.282  | N/A     | N/A     | N/A     | N/A     | N/A     | N/A     | N/A      | N/A       | N/A       | N/A | N/A | N/A |
|          | 75 <sup>th</sup> percentile     | 2.060         | 0.454   | N/A     | N/A     | N/A     | N/A     | N/A     | N/A     | N/A      | N/A       | N/A       | N/A | N/A | N/A |
|          | Mean<br><i>MAE</i> / $\sqrt{n}$ | -0.670        | -0.601  | N/A     | N/A     | N/A     | N/A     | N/A     | N/A     | N/A      | N/A       | N/A       | N/A | N/A | N/A |
| Sulphate | 25 <sup>th</sup> percentile     | 1.545         | 0.859   | N/A     | N/A     | N/A     | N/A     | N/A     | N/A     | N/A      | N/A       | N/A       | N/A | N/A | N/A |
|          | 50 <sup>th</sup> percentile     | -0.114        | 0.123   | N/A     | N/A     | N/A     | N/A     | N/A     | N/A     | N/A      | N/A       | N/A       | N/A | N/A | N/A |
|          | 75 <sup>th</sup> percentile     | 0.202         | 0.521   | N/A     | N/A     | N/A     | N/A     | N/A     | N/A     | N/A      | N/A       | N/A       | N/A | N/A | N/A |
|          | Mean<br><i>MAE</i> / $\sqrt{n}$ | 0.609         | 0.786   | N/A     | N/A     | N/A     | N/A     | N/A     | N/A     | N/A      | N/A       | N/A       | N/A | N/A | N/A |
| Nitrate  | 25 <sup>th</sup> percentile     | 0.225         | 0.468   | N/A     | N/A     | N/A     | N/A     | N/A     | N/A     | N/A      | N/A       | N/A       | N/A | N/A | N/A |
|          | 50 <sup>th</sup> percentile     | 0.164         | 0.244   | N/A     | N/A     | N/A     | N/A     | N/A     | N/A     | N/A      | N/A       | N/A       | N/A | N/A | N/A |
|          | 75 <sup>th</sup> percentile     | -0.067        | -0.084  | N/A     | N/A     | N/A     | N/A     | N/A     | N/A     | N/A      | N/A       | N/A       | N/A | N/A | N/A |
|          | Mean<br><i>MAE</i> / $\sqrt{n}$ | -0.014        | -0.007  | N/A     | N/A     | N/A     | N/A     | N/A     | N/A     | N/A      | N/A       | N/A       | N/A | N/A | N/A |
| Ammonium | 25 <sup>th</sup> percentile     | 0.059         | 0.018   | N/A     | N/A     | N/A     | N/A     | N/A     | N/A     | N/A      | N/A       | N/A       | N/A | N/A | N/A |
|          | 50 <sup>th</sup> percentile     | 0.006         | -0.028  | N/A     | N/A     | N/A     | N/A     | N/A     | N/A     | N/A      | N/A       | N/A       | N/A | N/A | N/A |
|          | 75 <sup>th</sup> percentile     | 0.038         | 0.040   | N/A     | N/A     | N/A     | N/A     | N/A     | N/A     | N/A      | N/A       | N/A       | N/A | N/A | N/A |
|          | Mean<br><i>MAE</i> / $\sqrt{n}$ | -0.190        | -0.640  | N/A     | N/A     | N/A     | N/A     | N/A     | N/A     | N/A      | N/A       | N/A       | N/A | N/A | N/A |
|          | 25 <sup>th</sup> percentile     | 0.499         | -0.156  | N/A     | N/A     | N/A     | N/A     | N/A     | N/A     | N/A      | N/A       | N/A       | N/A | N/A | N/A |
|          | 50 <sup>th</sup> percentile     | 1.737         | 1.529   | N/A     | N/A     | N/A     | N/A     | N/A     | N/A     | N/A      | N/A       | N/A       | N/A | N/A | N/A |
|          | 75 <sup>th</sup> percentile     | 0.580         | 0.324   | N/A     | N/A     | N/A     | N/A     | N/A     | N/A     | N/A      | N/A       | N/A       | N/A | N/A | N/A |
|          | Mean<br><i>MAE</i> / $\sqrt{n}$ | 0.483         | 0.464   | N/A     | N/A     | N/A     | N/A     | N/A     | N/A     | N/A      | N/A       | N/A       | N/A | N/A | N/A |

Table S3b: Profile statistics summary for the easterly cluster from 5.5-11.0km.



| Species  | Statistic                   | Altitude (km) |         |         |         |         |         |         |         |         |         |         |  |
|----------|-----------------------------|---------------|---------|---------|---------|---------|---------|---------|---------|---------|---------|---------|--|
|          |                             | 0.0-0.5       | 0.5-1.0 | 1.0-1.5 | 1.5-2.0 | 2.0-2.5 | 2.5-3.0 | 3.0-3.5 | 3.5-4.0 | 4.0-4.5 | 4.5-5.0 | 5.0-5.5 |  |
| Organics | 25 <sup>th</sup> percentile | 0.470         | 0.063   | 0.108   | -0.242  | -0.036  | 0.0109  | -0.380  | -1.026  | -1.427  | -0.673  | -2.011  |  |
|          | 50 <sup>th</sup> percentile | 1.555         | 0.678   | 1.255   | 0.681   | 0.959   | 0.424   | 0.424   | -0.100  | -0.145  | 0.465   | -0.567  |  |
|          | 75 <sup>th</sup> percentile | 2.312         | 2.280   | 2.337   | 1.861   | 1.883   | 1.568   | 1.285   | 0.306   | 0.803   | 1.527   | 0.741   |  |
|          | Mean                        | 1.927         | 1.419   | 1.385   | 1.253   | 1.035   | 0.689   | 0.505   | -0.2156 | -0.289  | 0.220   | -0.519  |  |
| Sulphate | $MAE/\sqrt{n}$              | 0.208         | 0.174   | 0.248   | 0.204   | 0.282   | 0.218   | 0.180   | 0.376   | 0.451   | 0.538   | 0.349   |  |
|          | 25 <sup>th</sup> percentile | 0.314         | 0.342   | 0.302   | 0.031   | 0.250   | 0.030   | -0.111  | 0.058   | -0.098  | -0.054  | -0.174  |  |
|          | 50 <sup>th</sup> percentile | 1.251         | 1.035   | 0.894   | 0.399   | 0.637   | 0.418   | 0.139   | 0.253   | 0.031   | 0.104   | 0.082   |  |
|          | 75 <sup>th</sup> percentile | 2.454         | 1.748   | 1.548   | 1.482   | 1.071   | 0.810   | 0.386   | 0.374   | 0.406   | 0.375   | 0.528   |  |
| Nitrate  | Mean                        | 1.740         | 1.431   | 1.089   | 1.052   | 0.860   | 0.440   | 0.156   | 0.227   | 0.089   | 0.150   | 0.216   |  |
|          | $MAE/\sqrt{n}$              | 0.165         | 0.125   | 0.114   | 0.135   | 0.100   | 0.105   | 0.045   | 0.065   | 0.073   | 0.079   | 0.109   |  |
|          | 25 <sup>th</sup> percentile | 0.019         | 0.022   | 0.019   | -0.008  | -0.005  | -0.016  | -0.029  | -0.027  | 0.009   | -0.116  | -0.058  |  |
|          | 50 <sup>th</sup> percentile | 0.108         | 0.115   | 0.086   | 0.026   | 0.061   | 0.072   | 0.019   | 0.060   | 0.057   | -0.007  | 0.026   |  |
| Ammonium | 75 <sup>th</sup> percentile | 0.910         | 1.036   | 0.642   | 0.323   | 0.416   | 0.227   | 0.053   | 0.118   | 0.172   | 0.022   | 0.180   |  |
|          | Mean                        | 2.124         | 1.394   | 0.855   | 0.848   | 0.423   | 0.164   | 0.032   | 0.053   | 0.086   | -0.021  | 0.065   |  |
|          | $MAE/\sqrt{n}$              | 0.283         | 0.156   | 0.101   | 0.115   | 0.074   | 0.032   | 0.010   | 0.047   | 0.038   | 0.050   | 0.037   |  |
|          | 25 <sup>th</sup> percentile | -0.070        | -0.034  | -0.135  | -0.342  | -0.419  | -0.187  | -0.279  | -0.778  | -0.897  | -0.402  | -0.697  |  |
| Ammonium | 50 <sup>th</sup> percentile | 0.241         | 0.334   | 0.320   | 0.198   | 0.281   | 0.237   | 0.011   | 0.144   | 0.104   | 0.409   | -0.054  |  |
|          | 75 <sup>th</sup> percentile | 1.117         | 1.031   | 1.015   | 1.029   | 0.737   | 0.705   | 0.521   | 0.745   | 0.778   | 1.040   | 1.046   |  |
|          | Mean                        | 1.034         | 0.876   | 0.513   | 0.541   | 0.239   | 0.258   | 0.104   | -0.044  | -0.035  | 0.451   | 0.001   |  |
|          | $MAE/\sqrt{n}$              | 0.134         | 0.116   | 0.102   | 0.110   | 0.184   | 0.108   | 0.069   | 0.370   | 0.335   | 0.157   | 0.240   |  |

Table S4a: Profile statistics summary for the stagnant air mass cluster from 0.0-5.5km.

| Species  | Statistic                   | Altitude (km) |         |         |         |         |         |         |         |          |           |           |
|----------|-----------------------------|---------------|---------|---------|---------|---------|---------|---------|---------|----------|-----------|-----------|
|          |                             | 5.5-6.0       | 6.0-6.5 | 6.5-7.0 | 7.0-7.5 | 7.5-8.0 | 8.0-8.5 | 8.5-9.0 | 9.0-9.5 | 9.5-10.0 | 10.0-10.5 | 10.5-11.0 |
| Organics | 25 <sup>th</sup> percentile | -1.351        | -1.701  | -1.172  | -1.702  | -1.045  | -1.644  | -1.945  | -2.274  | -3.905   | -2.822    | -2.215    |
|          | 50 <sup>th</sup> percentile | 0.826         | 0.003   | 0.525   | 0.320   | 0.119   | 0.969   | -0.639  | -0.148  | -0.476   | -0.651    | -0.850    |
|          | 75 <sup>th</sup> percentile | 2.894         | 0.675   | 2.715   | 2.338   | 2.551   | 2.874   | 1.237   | 2.573   | 2.444    | 3.081     | 1.585     |
|          | Mean                        | 0.874         | -0.321  | 0.792   | 0.306   | 0.386   | 0.624   | -0.420  | 1.076   | -0.622   | -0.745    | -0.025    |
| Sulphate | $MAE/\sqrt{n}$              | 0.716         | 0.608   | 0.626   | 0.510   | 0.633   | 0.705   | 0.398   | 0.605   | 1.020    | 1.365     | 0.743     |
|          | 25 <sup>th</sup> percentile | 0.169         | -0.320  | -0.289  | -0.318  | -0.216  | -0.151  | -0.047  | -0.105  | -0.426   | -0.025    | 0.5156    |
|          | 50 <sup>th</sup> percentile | 0.388         | 0.182   | -0.049  | 0.082   | 0.203   | 0.260   | 0.424   | 0.454   | 0.429    | 0.462     | 0.865     |
|          | 75 <sup>th</sup> percentile | 0.651         | 0.612   | 0.488   | 0.660   | 0.598   | 1.039   | 0.715   | 0.909   | 0.832    | 0.991     | 1.255     |
| Nitrate  | Mean                        | 0.373         | 0.188   | 0.067   | 0.130   | 0.236   | 0.346   | 0.386   | 0.337   | 0.273    | 0.495     | 0.901     |
|          | $MAE/\sqrt{n}$              | 0.132         | 0.136   | 0.130   | 0.121   | 0.096   | 0.138   | 0.115   | 0.144   | 0.279    | 0.206     | 0.145     |
|          | 25 <sup>th</sup> percentile | -0.173        | -0.275  | -0.516  | -0.310  | -0.239  | -0.275  | -0.346  | -0.445  | -0.174   | -0.474    | -0.194    |
|          | 50 <sup>th</sup> percentile | 0.141         | -0.005  | -0.241  | 0.167   | -0.006  | 0.051   | 0.094   | -0.150  | 0.206    | -0.264    | 0.239     |
| Ammonium | 75 <sup>th</sup> percentile | 0.305         | 0.262   | 0.107   | 0.287   | 0.231   | 0.318   | 0.322   | 0.163   | 0.471    | 0.336     | 0.551     |
|          | Mean                        | 0.105         | -0.038  | -0.210  | 0.032   | -0.008  | -0.031  | 0.001   | -0.010  | 0.188    | -0.095    | 0.205     |
|          | $MAE/\sqrt{n}$              | 0.082         | 0.087   | 0.117   | 0.086   | 0.075   | 0.109   | 0.087   | 0.073   | 0.122    | 0.108     | 0.152     |
|          | 25 <sup>th</sup> percentile | -0.576        | -0.350  | -0.748  | -0.656  | -0.862  | -0.733  | -1.032  | -1.596  | -2.976   | -0.697    | -0.790    |
| Ammonium | 50 <sup>th</sup> percentile | 0.364         | 0.502   | 0.448   | 0.169   | 0.364   | 0.227   | 0.519   | 0.186   | 0.404    | 0.147     | 0.129     |
|          | 75 <sup>th</sup> percentile | 1.051         | 1.216   | 1.124   | 0.955   | 0.972   | 1.280   | 1.547   | 1.512   | 1.090    | 1.637     | 0.7856    |
|          | Mean                        | 0.231         | 0.417   | 0.305   | 0.047   | 0.224   | 0.231   | 0.347   | -0.114  | -0.510   | 0.267     | 0.286     |
|          | $MAE/\sqrt{n}$              | 0.254         | 0.276   | 0.599   | 0.319   | 0.315   | 0.287   | 0.331   | 0.393   | 1.127    | 0.340     | 0.375     |

Table S4b: Profile statistics summary for the stagnant air mass cluster from 5.5-11.0km.

| Species  | Statistic                   | Altitude (km) |         |         |         |         |         |         |         |         |         |         |  |
|----------|-----------------------------|---------------|---------|---------|---------|---------|---------|---------|---------|---------|---------|---------|--|
|          |                             | 0.0-0.5       | 0.5-1.0 | 1.0-1.5 | 1.5-2.0 | 2.0-2.5 | 2.5-3.0 | 3.0-3.5 | 3.5-4.0 | 4.0-4.5 | 4.5-5.0 | 5.0-5.5 |  |
| Organics | 25 <sup>th</sup> percentile | 1.274         | -1.415  | -1.214  | 0.032   | -0.468  | -1.238  | -0.782  | -0.180  | -1.400  | -2.032  | -1.919  |  |
|          | 50 <sup>th</sup> percentile | 2.588         | 0.915   | 0.401   | 1.100   | 0.620   | 0.465   | -0.277  | 0.291   | -0.228  | -0.669  | -0.344  |  |
|          | 75 <sup>th</sup> percentile | 5.263         | 2.101   | 2.231   | 2.268   | 1.276   | 2.133   | 1.080   | 1.448   | 1.089   | 0.275   | 0.999   |  |
|          | Mean                        | 3.290         | 0.884   | 0.810   | 1.153   | 0.722   | 0.713   | 0.734   | 0.438   | -0.231  | -1.018  | -0.555  |  |
| Sulphate | $MAE/\sqrt{n}$              | 0.420         | 0.459   | 0.395   | 0.313   | 0.415   | 0.745   | 0.530   | 0.246   | 0.426   | 0.693   | 0.993   |  |
|          | 25 <sup>th</sup> percentile | 1.393         | 0.847   | 0.491   | 0.652   | 0.124   | -0.285  | 0.164   | -0.044  | 0.012   | 0.159   | 0.044   |  |
|          | 50 <sup>th</sup> percentile | 1.740         | 1.740   | 1.133   | 1.225   | 0.620   | 0.323   | 0.315   | 0.527   | 0.090   | 0.317   | 0.455   |  |
|          | 75 <sup>th</sup> percentile | 2.643         | 2.418   | 2.440   | 1.982   | 1.105   | 0.488   | 0.459   | 0.583   | 0.396   | 0.448   | 0.798   |  |
| Nitrate  | Mean                        | 2.068         | 2.176   | 1.903   | 1.443   | 0.681   | 0.060   | 0.302   | 0.383   | 0.156   | 0.289   | 0.379   |  |
|          | $MAE/\sqrt{n}$              | 0.145         | 0.181   | 0.220   | 0.138   | 0.131   | 0.284   | 0.059   | 0.226   | 0.055   | 0.092   | 0.188   |  |
|          | 25 <sup>th</sup> percentile | 0.167         | -0.155  | -0.145  | -0.073  | -0.083  | -0.056  | 0.020   | -0.027  | -0.112  | -0.013  | -0.049  |  |
|          | 50 <sup>th</sup> percentile | 0.575         | 0.047   | 0.032   | 0.088   | 0.037   | 0.109   | 0.089   | 0.027   | 0.001   | 0.073   | 0.058   |  |
| Ammonium | 75 <sup>th</sup> percentile | 2.947         | 0.204   | 0.174   | 0.342   | 0.209   | 0.394   | 0.135   | 0.100   | 0.061   | 0.171   | 0.245   |  |
|          | Mean                        | 1.867         | 0.361   | 0.150   | 0.185   | 0.210   | 0.121   | 0.092   | 0.031   | -0.013  | 0.072   | 0.113   |  |
|          | $MAE/\sqrt{n}$              | 0.281         | 0.064   | 0.046   | 0.041   | 0.045   | 0.110   | 0.026   | 0.025   | 0.048   | 0.042   | 0.067   |  |
|          | 25 <sup>th</sup> percentile | 0.290         | 0.069   | -0.110  | 0.091   | -0.217  | -0.159  | -0.429  | -0.429  | 0.027   | -0.322  | 0.342   |  |
| Ammonium | 50 <sup>th</sup> percentile | 1.051         | 0.490   | 0.444   | 0.637   | 0.262   | 0.300   | 0.373   | 0.414   | 0.462   | 0.167   | 0.543   |  |
|          | 75 <sup>th</sup> percentile | 2.177         | 1.160   | 1.064   | 1.244   | 0.832   | 1.229   | 0.637   | 0.623   | 0.985   | 0.699   | 1.270   |  |
|          | Mean                        | 1.237         | 0.760   | 0.635   | 0.635   | 0.215   | 0.673   | 0.166   | 0.212   | 0.455   | 0.092   | 0.797   |  |
|          | $MAE/\sqrt{n}$              | 0.155         | 0.164   | 0.162   | 0.126   | 0.151   | 0.312   | 0.258   | 0.353   | 0.235   | 0.241   | 0.177   |  |

Table S5a: Profile statistics summary for the southerly air mass cluster from 0.0-5.5km.

| Species  | Statistic                   | Altitude (km) |         |         |         |         |         |         |         |          |           |           |     |     |     |     |
|----------|-----------------------------|---------------|---------|---------|---------|---------|---------|---------|---------|----------|-----------|-----------|-----|-----|-----|-----|
|          |                             | 5.5-6.0       | 6.0-6.5 | 6.5-7.0 | 7.0-7.5 | 7.5-8.0 | 8.0-8.5 | 8.5-9.0 | 9.0-9.5 | 9.5-10.0 | 10.0-10.5 | 10.5-11.0 |     |     |     |     |
| Organics | 25 <sup>th</sup> percentile | -3.059        | N/A     | N/A     | N/A     | N/A     | N/A     | N/A     | N/A     | N/A      | N/A       | N/A       | N/A | N/A | N/A | N/A |
|          | 50 <sup>th</sup> percentile | -0.344        | N/A     | N/A     | N/A     | N/A     | N/A     | N/A     | N/A     | N/A      | N/A       | N/A       | N/A | N/A | N/A | N/A |
|          | 75 <sup>th</sup> percentile | -1.489        | N/A     | N/A     | N/A     | N/A     | N/A     | N/A     | N/A     | N/A      | N/A       | N/A       | N/A | N/A | N/A | N/A |
|          | Mean                        | -2.274        | N/A     | N/A     | N/A     | N/A     | N/A     | N/A     | N/A     | N/A      | N/A       | N/A       | N/A | N/A | N/A | N/A |
| Sulphate | $MAE/\sqrt{n}$              | 0.785         | N/A     | N/A     | N/A     | N/A     | N/A     | N/A     | N/A     | N/A      | N/A       | N/A       | N/A | N/A | N/A | N/A |
|          | 25 <sup>th</sup> percentile | -0.006        | N/A     | N/A     | N/A     | N/A     | N/A     | N/A     | N/A     | N/A      | N/A       | N/A       | N/A | N/A | N/A | N/A |
|          | 50 <sup>th</sup> percentile | 0.455         | N/A     | N/A     | N/A     | N/A     | N/A     | N/A     | N/A     | N/A      | N/A       | N/A       | N/A | N/A | N/A | N/A |
|          | 75 <sup>th</sup> percentile | 1.403         | N/A     | N/A     | N/A     | N/A     | N/A     | N/A     | N/A     | N/A      | N/A       | N/A       | N/A | N/A | N/A | N/A |
| Nitrate  | Mean                        | 0.698         | N/A     | N/A     | N/A     | N/A     | N/A     | N/A     | N/A     | N/A      | N/A       | N/A       | N/A | N/A | N/A | N/A |
|          | $MAE/\sqrt{n}$              | 0.704         | N/A     | N/A     | N/A     | N/A     | N/A     | N/A     | N/A     | N/A      | N/A       | N/A       | N/A | N/A | N/A | N/A |
|          | 25 <sup>th</sup> percentile | -0.009        | N/A     | N/A     | N/A     | N/A     | N/A     | N/A     | N/A     | N/A      | N/A       | N/A       | N/A | N/A | N/A | N/A |
|          | 50 <sup>th</sup> percentile | 0.058         | N/A     | N/A     | N/A     | N/A     | N/A     | N/A     | N/A     | N/A      | N/A       | N/A       | N/A | N/A | N/A | N/A |
| Ammonium | 75 <sup>th</sup> percentile | 0.117         | N/A     | N/A     | N/A     | N/A     | N/A     | N/A     | N/A     | N/A      | N/A       | N/A       | N/A | N/A | N/A | N/A |
|          | Mean                        | 0.054         | N/A     | N/A     | N/A     | N/A     | N/A     | N/A     | N/A     | N/A      | N/A       | N/A       | N/A | N/A | N/A | N/A |
|          | $MAE/\sqrt{n}$              | 0.063         | N/A     | N/A     | N/A     | N/A     | N/A     | N/A     | N/A     | N/A      | N/A       | N/A       | N/A | N/A | N/A | N/A |
|          | 25 <sup>th</sup> percentile | -0.535        | N/A     | N/A     | N/A     | N/A     | N/A     | N/A     | N/A     | N/A      | N/A       | N/A       | N/A | N/A | N/A | N/A |
| Ammonium | 50 <sup>th</sup> percentile | 0.543         | N/A     | N/A     | N/A     | N/A     | N/A     | N/A     | N/A     | N/A      | N/A       | N/A       | N/A | N/A | N/A | N/A |
|          | 75 <sup>th</sup> percentile | 0.146         | N/A     | N/A     | N/A     | N/A     | N/A     | N/A     | N/A     | N/A      | N/A       | N/A       | N/A | N/A | N/A | N/A |
|          | Mean                        | -0.194        | N/A     | N/A     | N/A     | N/A     | N/A     | N/A     | N/A     | N/A      | N/A       | N/A       | N/A | N/A | N/A | N/A |
|          | $MAE/\sqrt{n}$              | 0.341         | N/A     | N/A     | N/A     | N/A     | N/A     | N/A     | N/A     | N/A      | N/A       | N/A       | N/A | N/A | N/A | N/A |

Table S5b: Profile statistics summary for the southerley air mass cluster from 5.5-11.0km.

| Species  | Statistic                   | Altitude (km) |         |         |         |         |         |         |         |         |         |         |  |
|----------|-----------------------------|---------------|---------|---------|---------|---------|---------|---------|---------|---------|---------|---------|--|
|          |                             | 0.0-0.5       | 0.5-1.0 | 1.0-1.5 | 1.5-2.0 | 2.0-2.5 | 2.5-3.0 | 3.0-3.5 | 3.5-4.0 | 4.0-4.5 | 4.5-5.0 | 5.0-5.5 |  |
| Organics | 25 <sup>th</sup> percentile | -0.403        | -0.498  | -0.226  | -0.547  | -0.416  | -0.531  | -0.293  | -0.565  | -1.231  | -0.472  | -0.818  |  |
|          | 50 <sup>th</sup> percentile | 0.034         | 0.078   | 0.308   | 0.278   | 0.037   | -0.243  | 0.134   | -0.251  | -0.380  | -0.227  | -0.265  |  |
|          | 75 <sup>th</sup> percentile | 0.706         | 0.860   | 1.198   | 1.692   | 0.456   | 0.311   | 1.179   | 1.037   | 0.513   | 0.832   | 0.420   |  |
|          | Mean                        | 0.253         | 0.483   | 0.652   | 0.761   | 0.166   | 0.082   | 0.235   | 0.253   | -0.369  | 0.114   | -0.271  |  |
| Sulphate | $MAE/\sqrt{n}$              | 0.102         | 0.125   | 0.162   | 0.149   | 0.165   | 0.154   | 0.193   | 0.218   | 0.296   | 0.248   | 0.321   |  |
|          | 25 <sup>th</sup> percentile | 0.014         | -0.019  | -0.043  | -0.106  | 0.009   | -0.015  | -0.025  | 0.041   | 0.051   | 0.123   | 0.001   |  |
|          | 50 <sup>th</sup> percentile | 0.147         | 0.130   | 0.043   | 0.106   | 0.104   | 0.094   | 0.241   | 0.100   | 0.197   | 0.215   | 0.194   |  |
|          | 75 <sup>th</sup> percentile | 0.538         | 0.597   | 0.378   | 0.361   | 0.324   | 0.236   | 0.522   | 0.257   | 0.489   | 0.303   | 0.380   |  |
| Nitrate  | Mean                        | 0.500         | 0.470   | 0.494   | 0.266   | 0.235   | 0.256   | 0.332   | 0.177   | 0.287   | 0.252   | 0.275   |  |
|          | $MAE/\sqrt{n}$              | 0.054         | 0.065   | 0.075   | 0.039   | 0.044   | 0.040   | 0.064   | 0.034   | 0.081   | 0.052   | 0.065   |  |
|          | 25 <sup>th</sup> percentile | -0.016        | -0.016  | -0.046  | -0.079  | -0.077  | -0.018  | -0.105  | -0.046  | -0.059  | -0.093  | 0.021   |  |
|          | 50 <sup>th</sup> percentile | 0.020         | 0.036   | 0.051   | 0.018   | -0.013  | 0.036   | -0.011  | 0.002   | 0.020   | 0.003   | 0.053   |  |
| Ammonium | 75 <sup>th</sup> percentile | 0.070         | 0.153   | 0.153   | 0.099   | 0.060   | 0.079   | 0.084   | 0.047   | 0.111   | 0.111   | 0.106   |  |
|          | Mean                        | 0.064         | 0.203   | 0.383   | 0.106   | -0.004  | 0.042   | 0.005   | 0.001   | 0.027   | 0.019   | 0.075   |  |
|          | $MAE/\sqrt{n}$              | 0.010         | 0.026   | 0.058   | 0.018   | 0.017   | 0.021   | 0.029   | 0.022   | 0.036   | 0.033   | 0.017   |  |
|          | 25 <sup>th</sup> percentile | -0.230        | -0.183  | -0.201  | -0.635  | -0.244  | -0.066  | -0.241  | -0.323  | -0.165  | 0.003   | -0.027  |  |
| Ammonium | 50 <sup>th</sup> percentile | 0.014         | 0.186   | 0.078   | 0.012   | 0.066   | 0.138   | 0.045   | -0.121  | 0.029   | 0.519   | 0.238   |  |
|          | 75 <sup>th</sup> percentile | 0.368         | 0.839   | 0.430   | 0.510   | 0.480   | 0.599   | 0.550   | 0.256   | 0.475   | 0.641   | 0.464   |  |
|          | Mean                        | 0.071         | 0.243   | 0.220   | -0.070  | 0.070   | 0.266   | 0.013   | 0.051   | 0.133   | 0.276   | 0.199   |  |
|          | $MAE/\sqrt{n}$              | 0.057         | 0.087   | 0.071   | 0.118   | 0.099   | 0.080   | 0.117   | 0.108   | 0.137   | 0.186   | 0.132   |  |

Table S6a: Profile statistics summary for the northerly air mass cluster from 0.0-5.5km.

| Species  | Statistic                   | Altitude (km) |         |         |         |         |         |         |         |          |           |           |     |     |
|----------|-----------------------------|---------------|---------|---------|---------|---------|---------|---------|---------|----------|-----------|-----------|-----|-----|
|          |                             | 5.5-6.0       | 6.0-6.5 | 6.5-7.0 | 7.0-7.5 | 7.5-8.0 | 8.0-8.5 | 8.5-9.0 | 9.0-9.5 | 9.5-10.0 | 10.0-10.5 | 10.5-11.0 |     |     |
| Organics | 25 <sup>th</sup> percentile | 0.281         | -1.212  | 0.759   | 0.014   | -0.838  | N/A     | N/A     | N/A     | N/A      | N/A       | N/A       | N/A | N/A |
|          | 50 <sup>th</sup> percentile | 0.390         | -0.047  | 1.835   | 1.094   | 1.069   | N/A     | N/A     | N/A     | N/A      | N/A       | N/A       | N/A | N/A |
|          | 75 <sup>th</sup> percentile | 1.270         | 0.935   | 2.596   | 1.862   | 1.445   | N/A     | N/A     | N/A     | N/A      | N/A       | N/A       | N/A | N/A |
|          | Mean                        | 0.699         | -0.108  | 1.730   | 0.990   | 0.559   | N/A     | N/A     | N/A     | N/A      | N/A       | N/A       | N/A | N/A |
| Sulphate | $MAE/\sqrt{n}$              | 0.220         | 0.589   | 0.971   | 1.330   | 1.396   | N/A     | N/A     | N/A     | N/A      | N/A       | N/A       | N/A | N/A |
|          | 25 <sup>th</sup> percentile | 0.028         | 0.079   | 0.018   | 0.223   | 0.102   | N/A     | N/A     | N/A     | N/A      | N/A       | N/A       | N/A | N/A |
|          | 50 <sup>th</sup> percentile | 0.133         | 0.261   | 0.161   | 0.302   | 0.721   | N/A     | N/A     | N/A     | N/A      | N/A       | N/A       | N/A | N/A |
|          | 75 <sup>th</sup> percentile | 0.456         | 0.390   | 0.831   | 0.333   | 1.058   | N/A     | N/A     | N/A     | N/A      | N/A       | N/A       | N/A | N/A |
| Nitrate  | Mean                        | 0.220         | 0.243   | 0.336   | 0.286   | 0.627   | N/A     | N/A     | N/A     | N/A      | N/A       | N/A       | N/A | N/A |
|          | $MAE/\sqrt{n}$              | 0.091         | 0.098   | 0.175   | 0.085   | 0.525   | N/A     | N/A     | N/A     | N/A      | N/A       | N/A       | N/A | N/A |
|          | 25 <sup>th</sup> percentile | -0.176        | -0.103  | -0.084  | -0.040  | 0.066   | N/A     | N/A     | N/A     | N/A      | N/A       | N/A       | N/A | N/A |
|          | 50 <sup>th</sup> percentile | -0.125        | -0.037  | 0.034   | 0.039   | 0.185   | N/A     | N/A     | N/A     | N/A      | N/A       | N/A       | N/A | N/A |
| Ammonium | 75 <sup>th</sup> percentile | 0.071         | 0.027   | 0.061   | 0.092   | 0.355   | N/A     | N/A     | N/A     | N/A      | N/A       | N/A       | N/A | N/A |
|          | Mean                        | -0.067        | -0.038  | 0.004   | 0.030   | 0.202   | N/A     | N/A     | N/A     | N/A      | N/A       | N/A       | N/A | N/A |
|          | $MAE/\sqrt{n}$              | 0.053         | 0.044   | 0.088   | 0.033   | 0.054   | N/A     | N/A     | N/A     | N/A      | N/A       | N/A       | N/A | N/A |
|          | 25 <sup>th</sup> percentile | -0.449        | -0.544  | -0.162  | -0.699  | -1.036  | N/A     | N/A     | N/A     | N/A      | N/A       | N/A       | N/A | N/A |
| Ammonium | 50 <sup>th</sup> percentile | 0.057         | -0.464  | 0.192   | 0.349   | -0.120  | N/A     | N/A     | N/A     | N/A      | N/A       | N/A       | N/A | N/A |
|          | 75 <sup>th</sup> percentile | 0.547         | -0.366  | 0.508   | 0.942   | 1.301   | N/A     | N/A     | N/A     | N/A      | N/A       | N/A       | N/A | N/A |
|          | Mean                        | 0.051         | -0.458  | 0.179   | 0.198   | 0.048   | N/A     | N/A     | N/A     | N/A      | N/A       | N/A       | N/A | N/A |
|          | $MAE/\sqrt{n}$              | 0.353         | 0.051   | 0.341   | 0.456   | 0.443   | N/A     | N/A     | N/A     | N/A      | N/A       | N/A       | N/A | N/A |

Table S6b: Profile statistics summary for the northerly air mass cluster from 5.5-11.0km.
